# Supplementary material for: Abnormal visual representations associated with confusion of perceived facial expression in schizophrenia with social anxiety disorder
Source: PubMed Central journal article supplement (PMC7529755; doi:10.1038/s41537-020-00116-1), 2020-10-01
Supplement: 41537_2020_116_MOESM2_ESM.pdf [file 41537_2020_116_MOESM2_ESM.pdf]

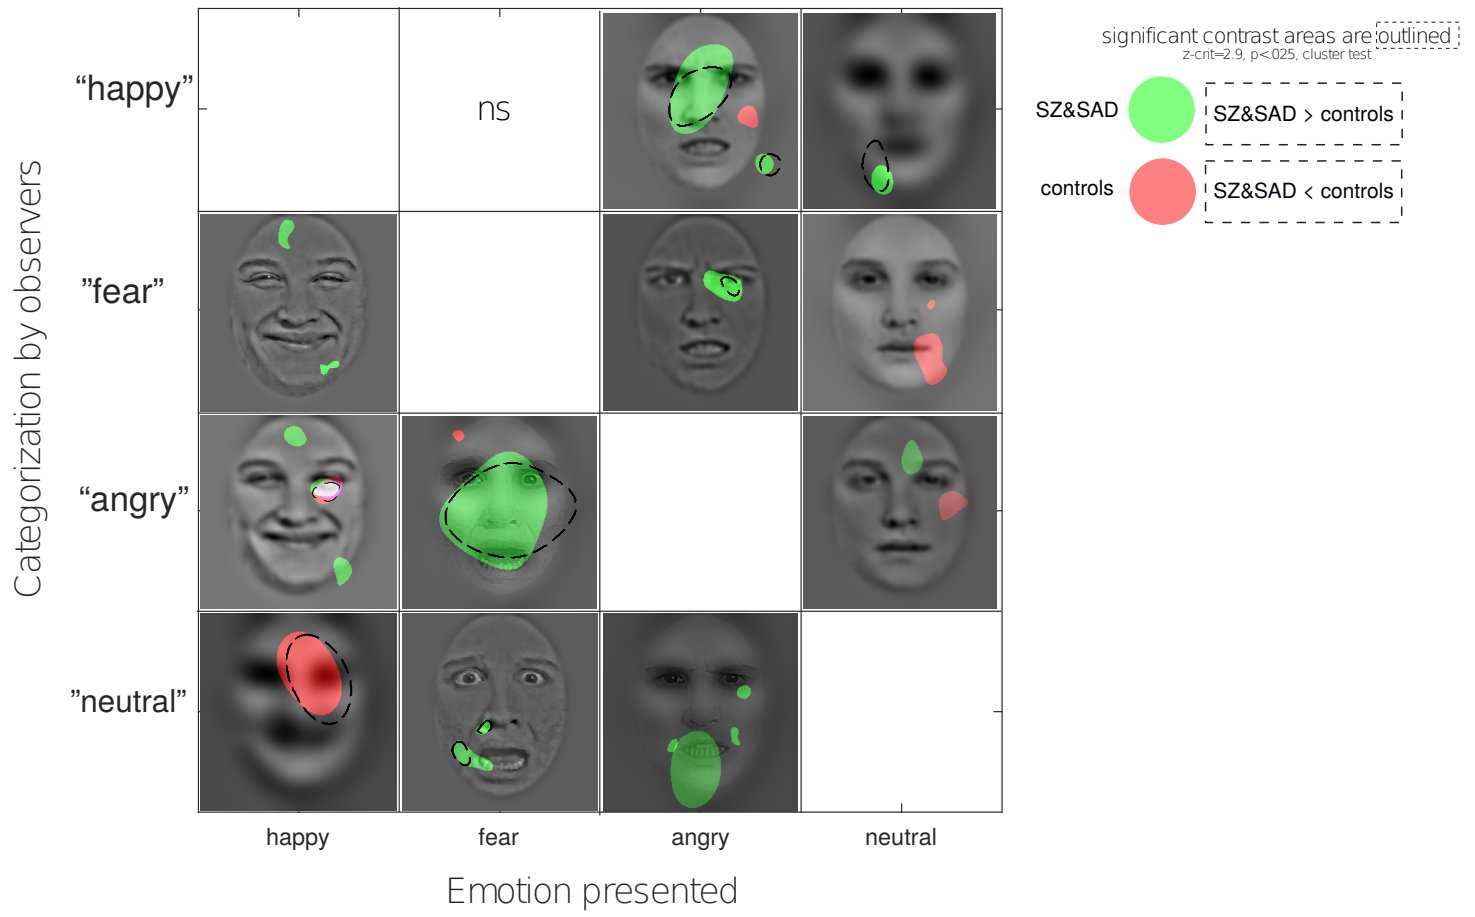

**Supplementary Figure 1. Facial cues driving emotion mis-attributions in SZ&SAD and controls**  
 Contrast between groups is shown in dotted lines (for details, see the Classification images section).  
 The authors have obtained consent for publication of the face images depicted in this figure.
